# Supplementary material
Source: publisher figshare collection journal article supplement (https://gsapubs.figshare.com/ndownloader/files/39498337)
Supplement: Supplementary file 1 [file 39498337]

| Horizon | Age (Ma) | Uncertainty (Ma) |
| --- | --- | --- |
| Sea Floor | 0 | +/- 0 |
| Top Miocene | 6 | +/- 1 |
| Top Paleogene | 23 | +/- 1 |
| Top Maastrichtian | 66 | +/- 2 |
| Top Santonian | 83 | +/- 1 |
| Top Albian | 103 | +/- 1 |
| Top Hauterivian | 130 | +/- 1 |
| Top Mid-Jurassic | 165 | +/- 5 |
| Top basement | 220 | +/- 10 |

TABLE S4: CALIBRATION OF HORIZONS IN ABSOLUTE AGES
